# Supplementary material
Source: PubMed Central journal article supplement (PMC3690971)

# Supplementary Figure 1. (a)

Hair color

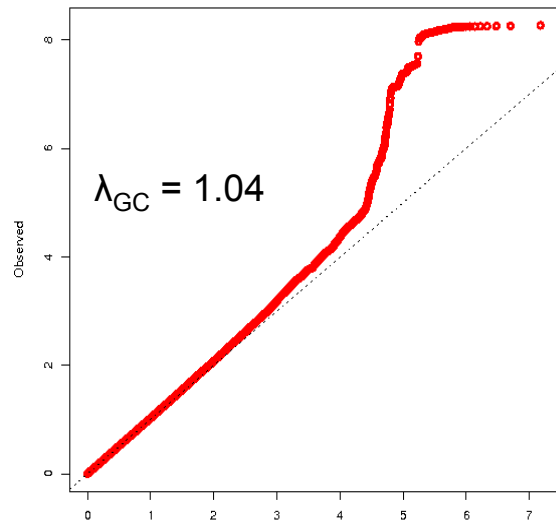

Tanning ability

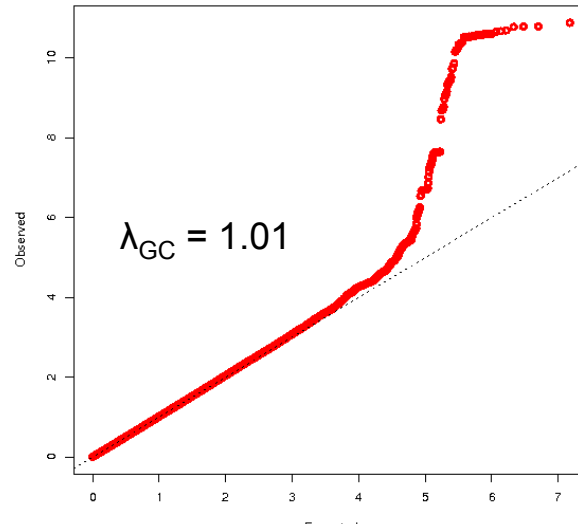

Number of sunburns

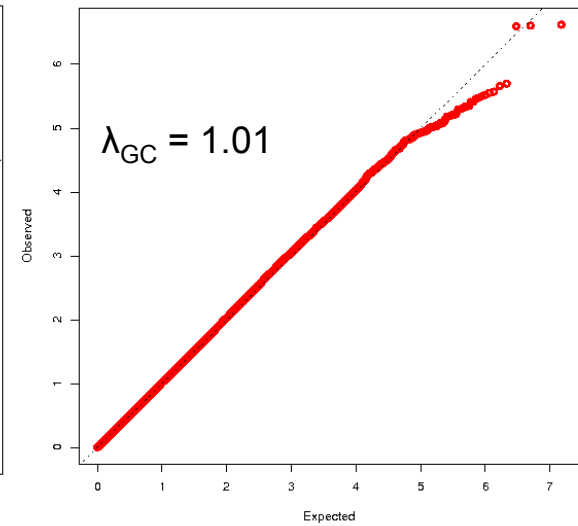

Brown eye color

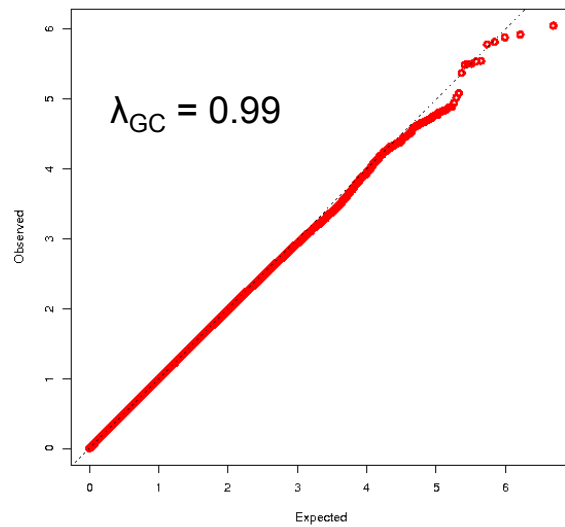

Blue eye color

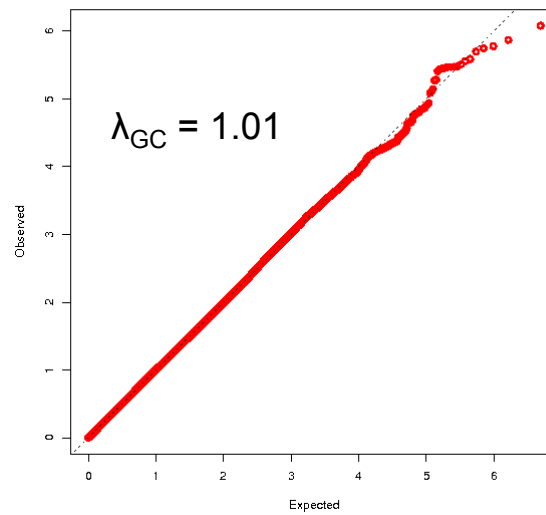

Intermediate eye color

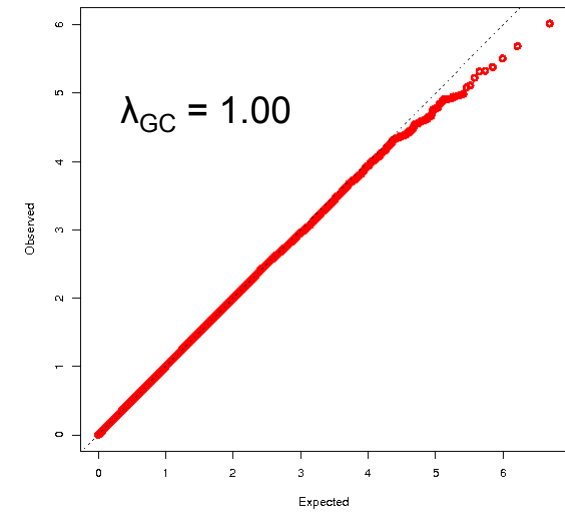

# Supplementary Figure 1. (b)

Number of NMSC

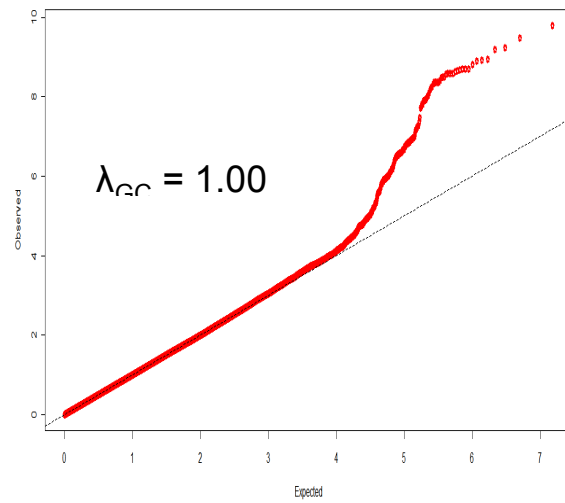

# Supplementary Figure 2. (a)

## Hair color

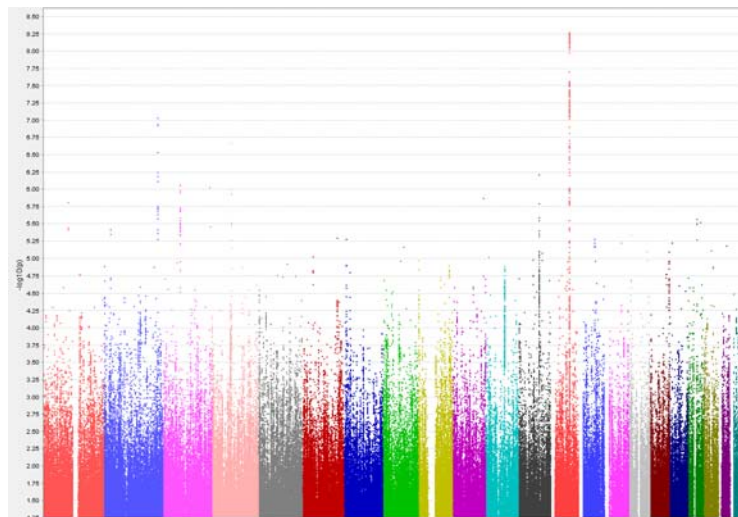

## Tanning ability

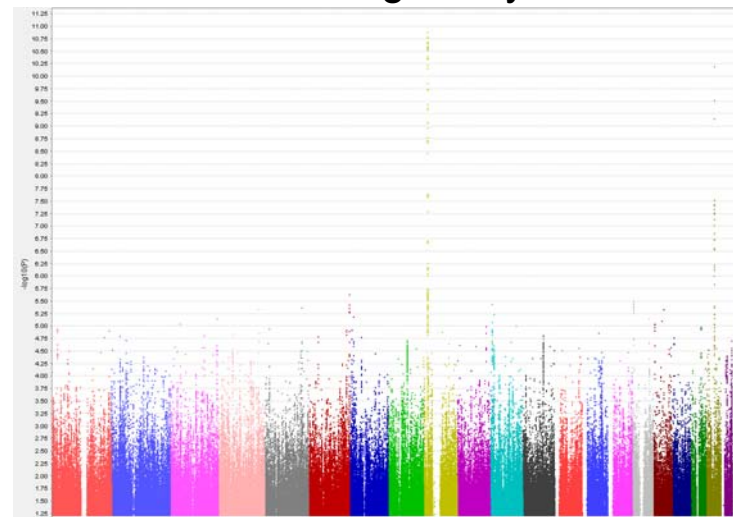

## Number of sunburns

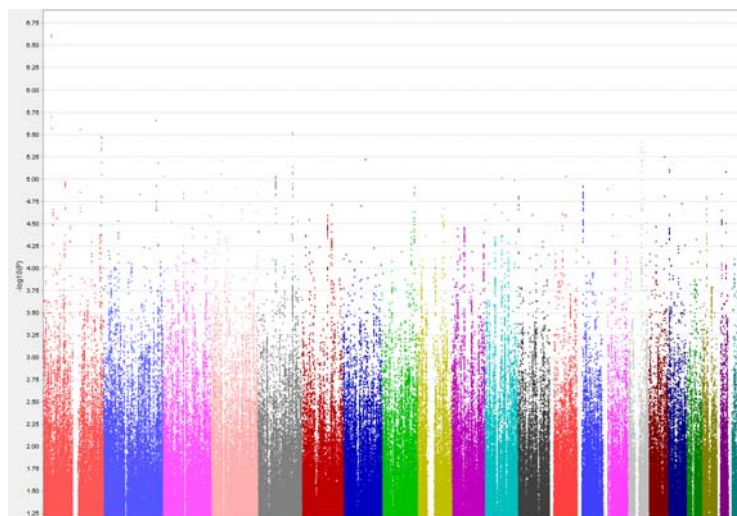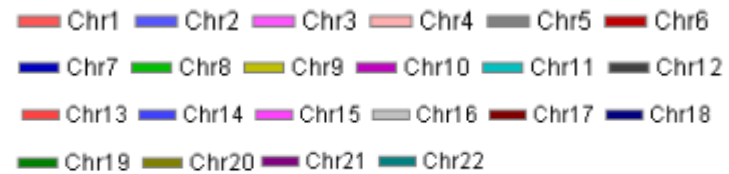

# Supplementary Figure 2. (b)

## Brown eye color

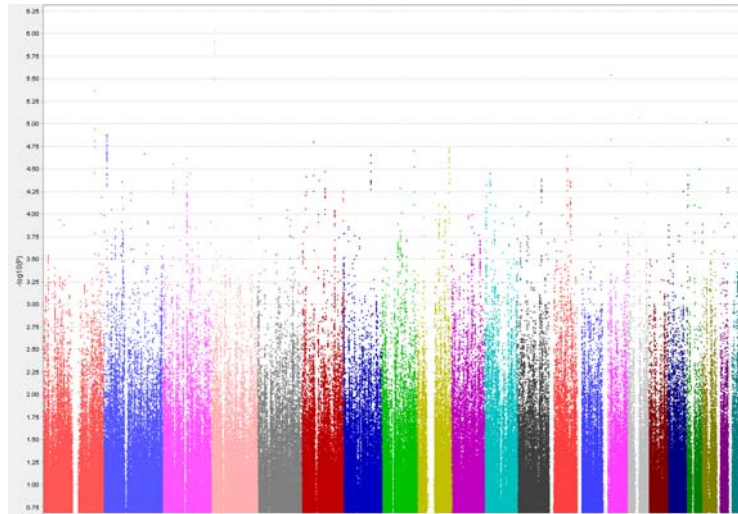

## Blue eye color

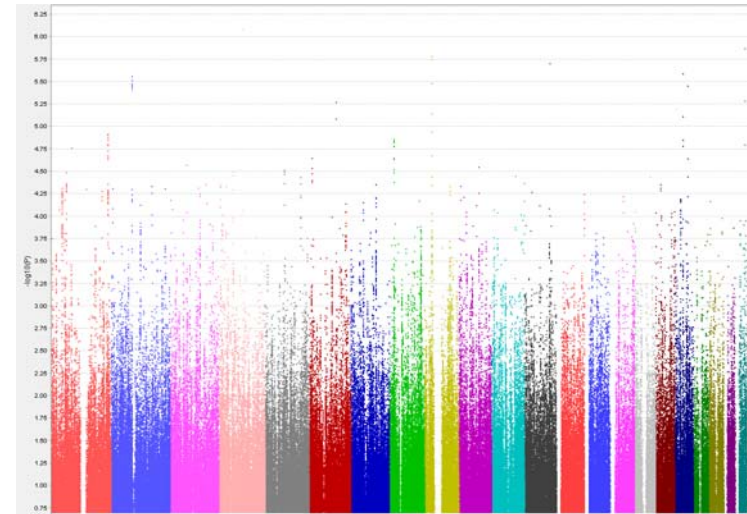

## Intermediate eye color

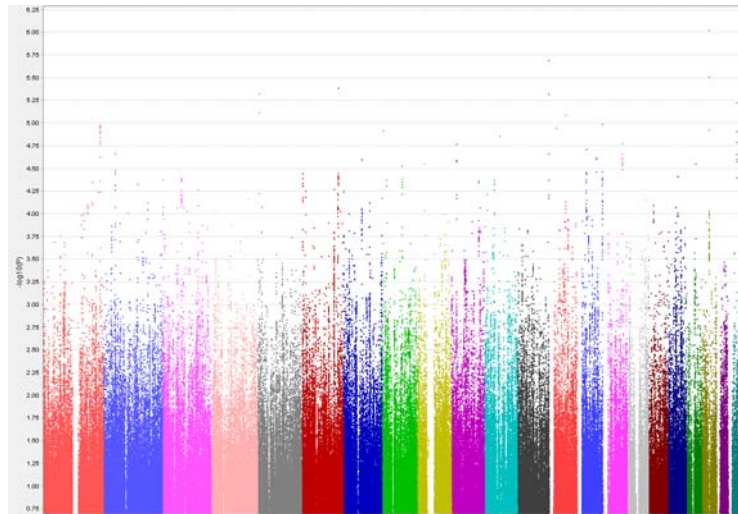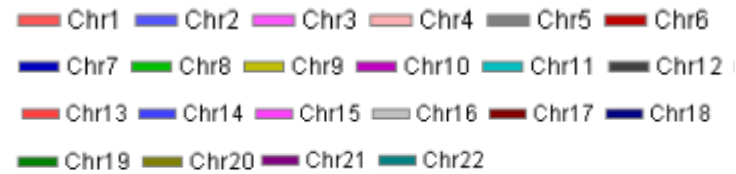

# Supplementary Figure 2. (c)

## Number of NMSC

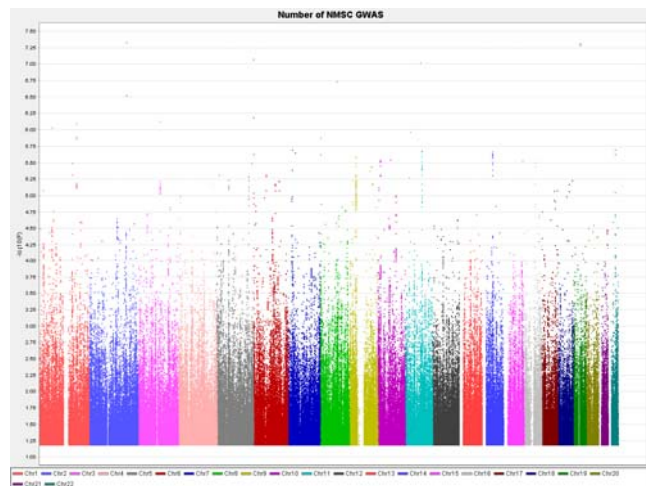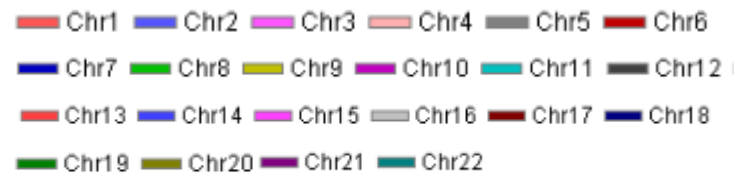

**Supplementary Figure 3.**

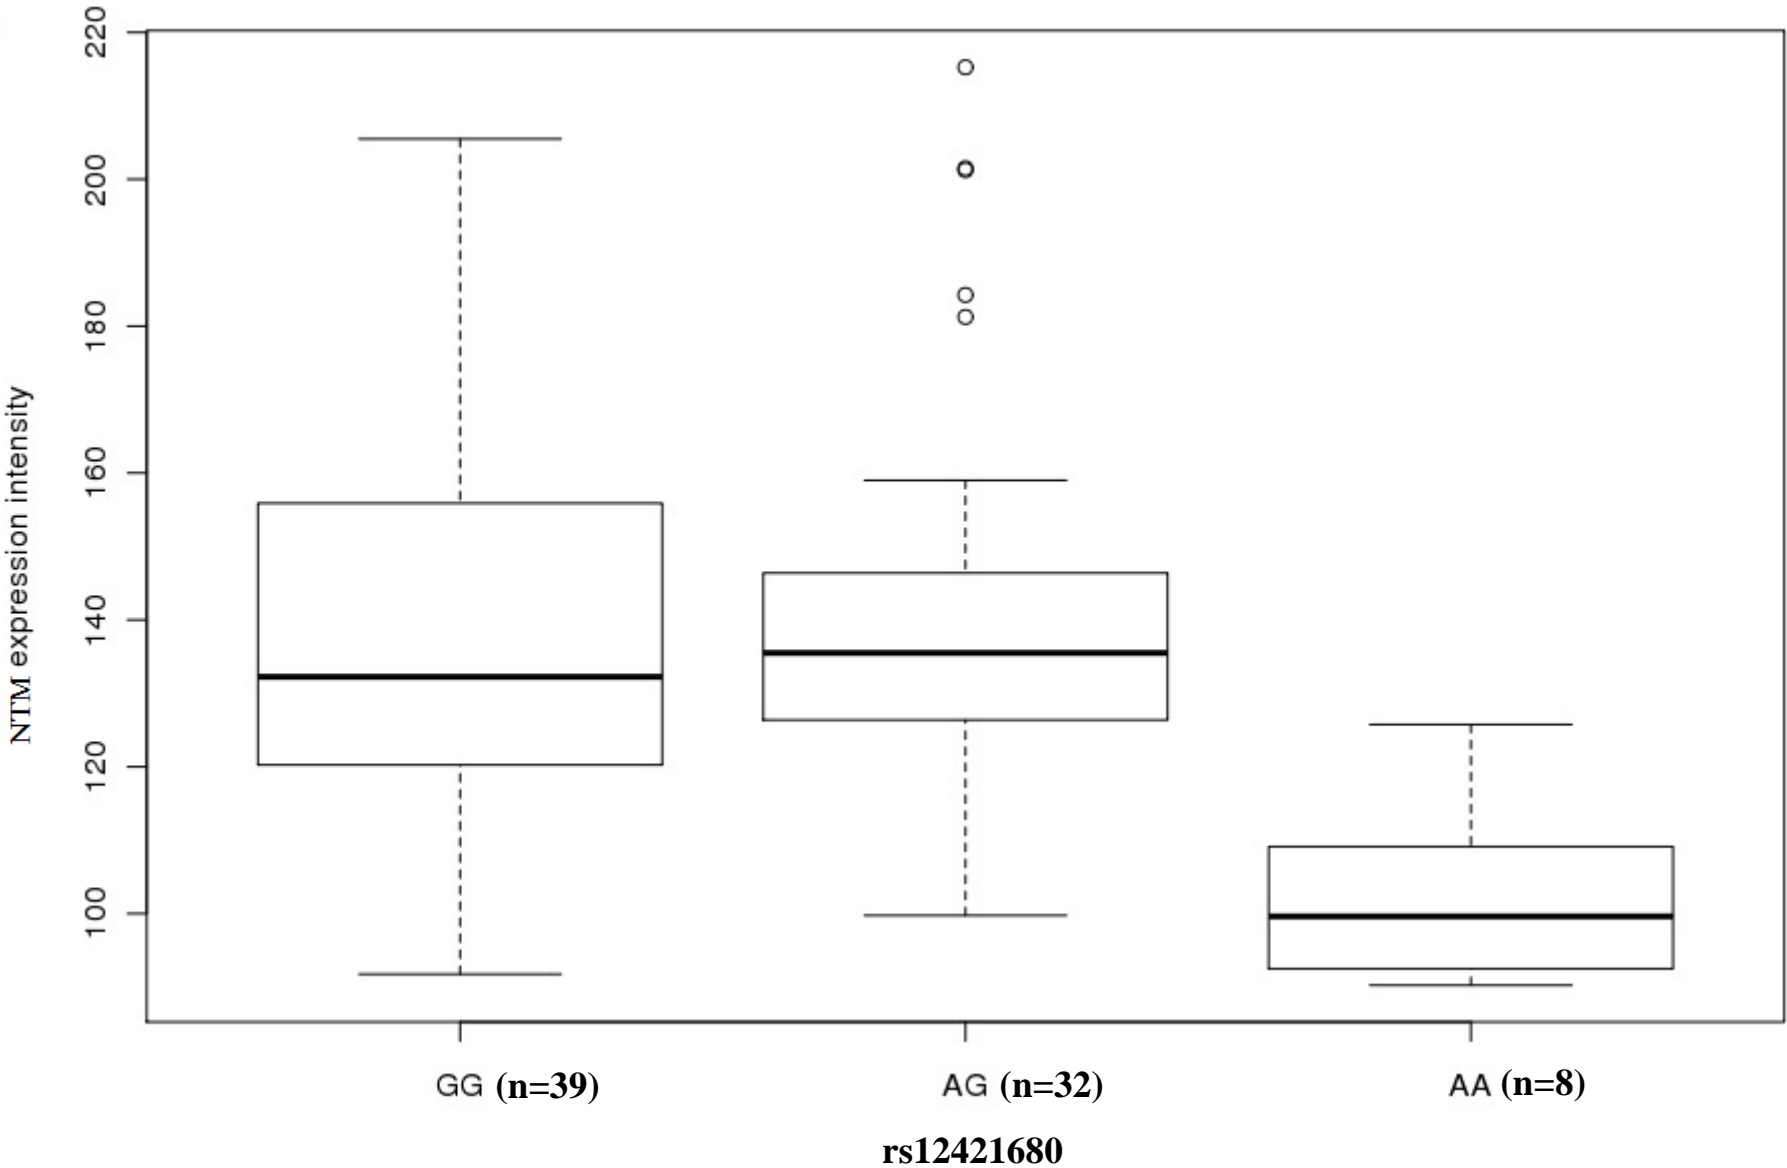

Supplement: supp_ddt142_ddt142supp_figs.pdf [file supp_ddt142_ddt142supp_figs.pdf]
